# Supplementary material
Source: PubMed Central journal article supplement (PMC2638981)
Supplement: djn253_1.pdf [file djn253_1.pdf]

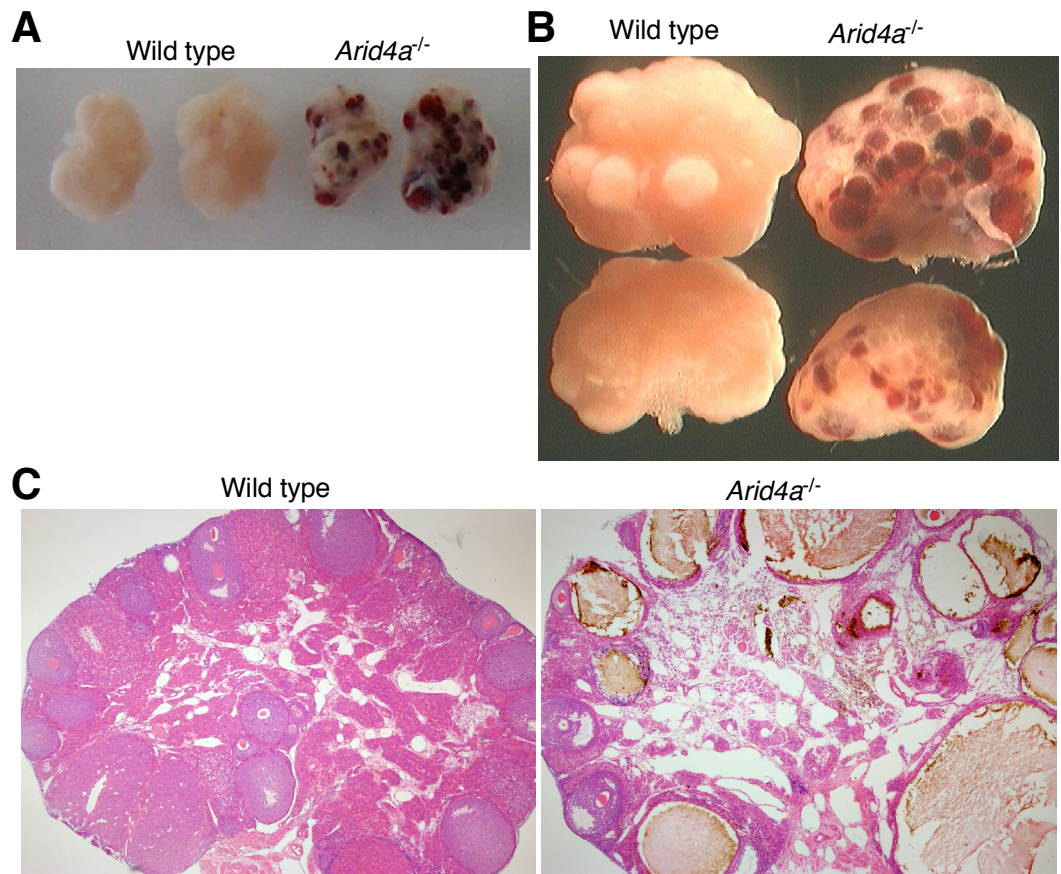

Supplementary Fig. 1. Hemorrhage in ovaries from the *Arid4a*<sup>-/-</sup> mice. A) Ovaries of wild type and the sick *Arid4a*<sup>-/-</sup> females. B) High magnification of ovaries from wild type and the sick *Arid4a*<sup>-/-</sup> females. C) Paraffin sections of ovaries from wild type and the sick *Arid4a*<sup>-/-</sup> mice were stained with H&E.
