# Supplementary material
Source: PubMed Central journal article supplement (PMC2638981)
Supplement: djn253_2.pdf [file djn253_2.pdf]

**Supplemental Table 1. Primer sequences and conditions for RT-PCR.**

| <b>Seq. Name</b> | <b>Sequence</b>             | <b>Annealing Temp.</b> | <b>Reference</b> |
|------------------|-----------------------------|------------------------|------------------|
| Hoxa7-F          | TTTCCGCATCTACCCCTGG         | 60                     | 28               |
| Hoxa7-R          | TAGGTCTGGCGTCCCG            | 60                     | 28               |
| Hoxa9-F          | CCGAAAACAATGCCGAGAAT        | 60                     | 28               |
| Hoxa9-R          | CCGGGTTATTGGGATCGAT         | 60                     | 28               |
| Hoxb3-F          | GATGCAGAAAGCCACCTACTAC      | 60                     |                  |
| Hoxb3-R          | CTTGGACGTTTGCCTCGACTC       | 60                     |                  |
| Hoxb4-F          | GCACGGTAAACCCCAATTA         | 58                     | 28               |
| Hoxb4-R          | GGCAACTTGTGGTCTTTTTT        | 58                     | 28               |
| Hoxb5-F          | GCTCAGGTAGCTTGTTCTTGG       | 60                     |                  |
| Hoxb5-R          | CTAATCACTGAGACAGGCCTGG      | 60                     |                  |
| Hoxb6-F          | GAGAACTGAGAATCGGACTCAC      | 60                     |                  |
| Hoxb6-R          | CAGCGAATCTACCATTGAACCG      | 60                     |                  |
| Hoxb8-F          | GACTCGCAAGCGGAGGATC         | 58                     | 28               |
| Hoxb8-R          | GAACCAGATTTTGACCTGTCTCTCT   | 58                     | 28               |
| Hoxc6-F          | CCAGGACCAGAAAGCCAGTATC      | 58                     | 28               |
| Hoxc6-R          | CGACCCCACTGTGCGAAT          | 58                     | 28               |
| Pbx1-F           | CAGGACATCGGGGACATTTTAC      | 60                     |                  |
| Pbx1-R           | CATTAAACAAGGCAGGCTTCATTC    | 60                     |                  |
| Meis1-F          | GAGCAAGGTGATGGCTTGGA        | 58                     | 28               |
| Meis1-R          | TGTCCTTATCAGGGTCATCATCG     | 58                     | 28               |
| Pitx2-F          | GTTAGGATTTTTCGCTTGCGAGC     | 60                     |                  |
| Pitx2-R          | CACAGGATGGGTCGTACATAGC      | 60                     |                  |
| AML1-F           | TTGTCGGGCGGAGCGGTAGAGG      | 58                     | 28               |
| AML1-R           | GTGACGGGCGGCGAGTAGGTGAA     | 58                     | 28               |
| Mii-F            | ACCAGGTCTCCTTCAGTTAAAGCTAGT | 58                     | 28               |
| Mii-R            | GAGAGGATGGCTGGGTTCC         | 58                     | 28               |
| Foxp3-F          | CACCCAGGAAAGACAGCAACCTT     | 58                     |                  |
| Foxp3-R          | CCTTGCCTTTCTCATCCAGGAG      | 58                     |                  |
| Hprt-F           | ATGACCTAGATTTGTTTTGTATAACC  | 60                     |                  |
| Hprt-R           | GTAGCTCTTCAGTCTGATAAAATCTAC | 60                     |                  |
